# Supplementary material
Source: MDPI journal article supplement (https://www.mdpi.com/2072-4292/15/7/1926)

70°W

60°W

30°S

50°S

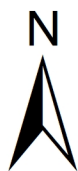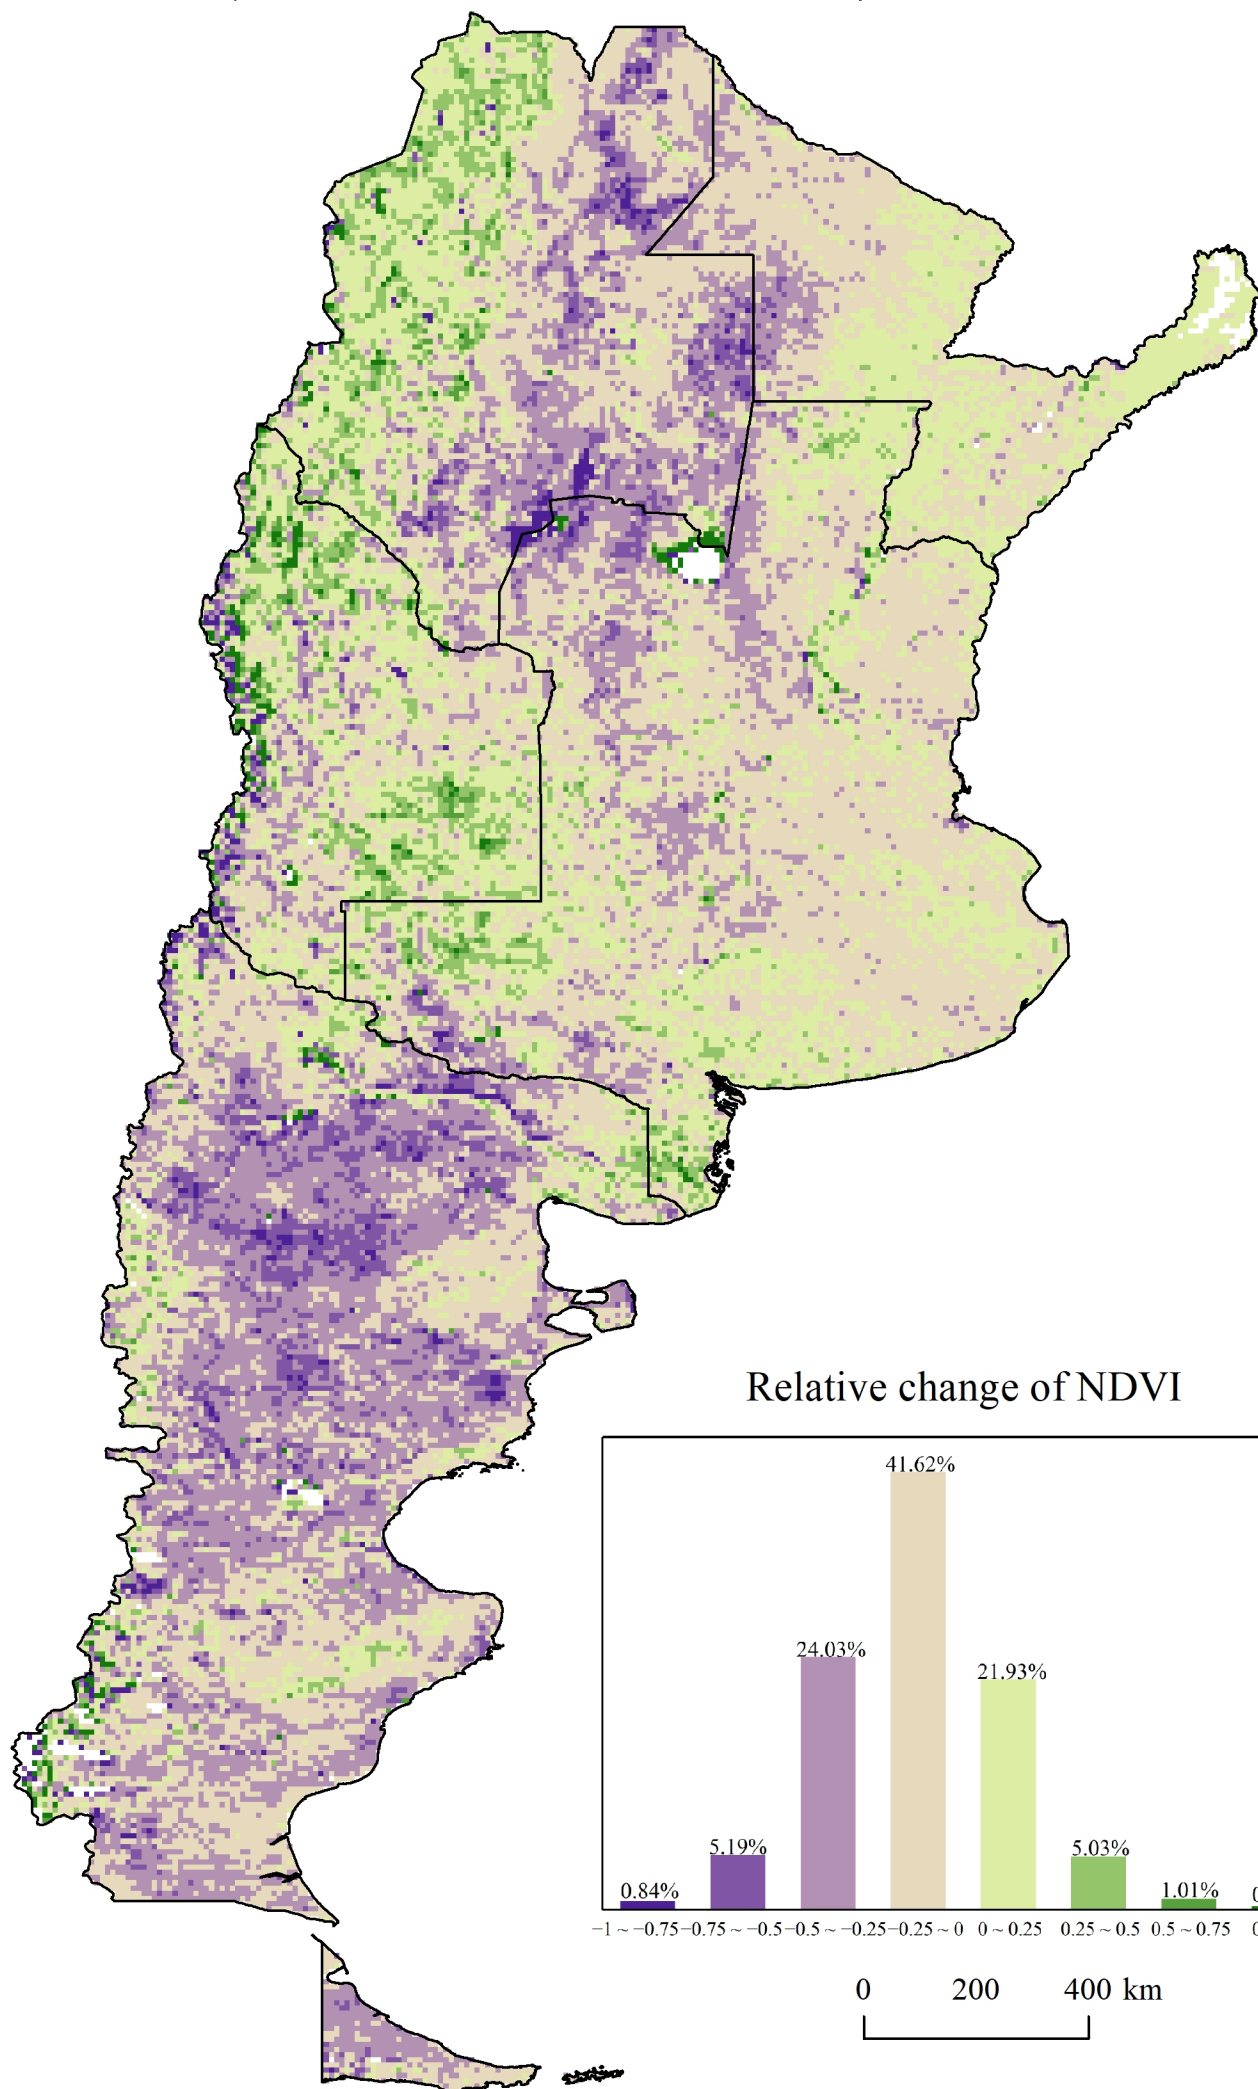

Relative change of NDVI

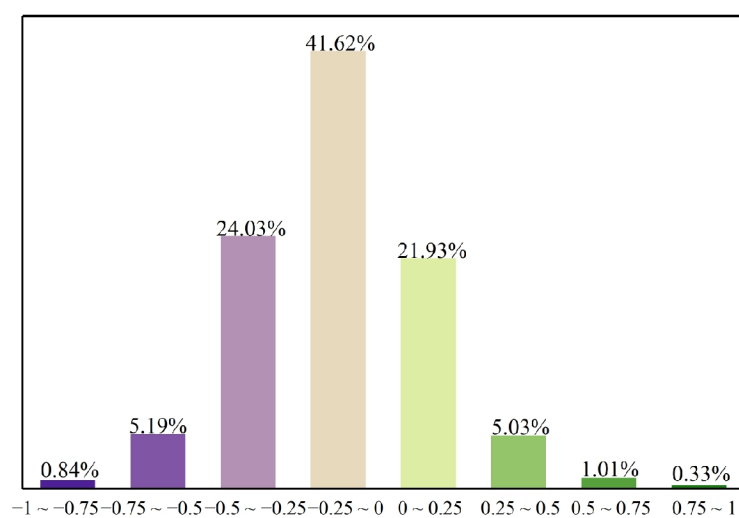

0 200 400 km

Supplement: s1 [file s1]
